# Supplementary material
Source: PubMed Central journal article supplement (PMC6344270)
Supplement: NIHMS1515971-supplement-Major_Resource_Table.pdf [file NIHMS1515971-supplement-Major_Resource_Table.pdf]

Babaev et al. “Loss of two Akt isoforms in hematopoietic cells diminished monocyte and macrophage survival and reduces atherosclerosis in *Ldl-receptor* null mice”.

### Major Resources Tables

#### Animals (in vivo studies)

| Species       | Vendor or Source     | Background Strain | Sex             |
|---------------|----------------------|-------------------|-----------------|
| Akt1 knockout | Jackson Laboratories | C57BL/6           | Female and male |
| Akt2 knockout | Jackson Laboratories | C57BL/6           | Female and male |
| Akt3 knockout | Univ. Pennsylvania   | C57BL/6           | Female and male |
| LDLR knockout | Jackson Laboratories | C57BL/6           | Female and male |
| C57BL/6       | Jackson Laboratories | C57BL/6           | Male            |

#### Antibodies

| Target antigen                           | Vendor or Source    | Catalog # | Working concentration | Lot # (preferred but not required) |
|------------------------------------------|---------------------|-----------|-----------------------|------------------------------------|
| Akt1                                     | Cell signaling Tech | 2938      | 1:1000                |                                    |
| Akt1                                     | Cell signaling Tech | 75692     | 1:2000                |                                    |
| Akt2                                     | Cell signaling Tech | 3063      | 1:8000                |                                    |
| Akt3                                     | Cell signaling Tech | 4059      | 1:1000                |                                    |
| Akt3                                     | Cell signaling Tech | 14982     | 1:1000                |                                    |
| Akt3                                     | Cell signaling Tech | 14293     | 1:1000                |                                    |
| Akt (pan)                                | Cell signaling Tech | 4685      | 1:10000               |                                    |
| Akt (pan)                                | Cell signaling Tech | 4691      | 1:10000               |                                    |
| $\beta$ -actin                           | Abcam               | Ab8227    | 1:10000               |                                    |
| p-Akt S <sup>473</sup>                   | Cell signaling Tech | 4060      | 1:2000                |                                    |
| p-Akt T <sup>308</sup>                   | Cell signaling Tech | 13038     | 1:1000                |                                    |
| p-BAD S <sup>136</sup>                   | Cell signaling Tech | 4366      | 1:500                 |                                    |
| p-BAD S <sup>155</sup>                   | Cell signaling Tech | 9297      | 1:1000                |                                    |
| p-PDK1 S <sup>241</sup>                  | Cell signaling Tech | 3438      | 1:2000                |                                    |
| p-GSK-3 $\alpha/\beta$ S <sup>21/9</sup> | Cell signaling Tech | 9331      | 1:2000                |                                    |
| PE anti-mouse CD90.2                     | BioLegend           | 140308    | 1:100                 |                                    |
| APC CD45R/B220                           | BioLegend           | 103212    | 1:100                 |                                    |
| PE/Cy7 CD11b                             | BioLegend           | 101216    | 1:200                 |                                    |
| Pacific blue Ly-6G                       | BioLegend           | 127612    | 1:200                 |                                    |
| FITC anti-mouse Ly-6C                    | BioLegend           | 128006    | 1:100                 |                                    |
| PE anti-mouse CD3                        | BioLegend           | 100206    | 1:100                 |                                    |
| APC anti-mouse CD19                      | BioLegend           | 115512    | 1:100                 |                                    |
| PerCP anti-mouse CD11b                   | BioLegend           | 101229    | 1:200                 |                                    |
| Brilliant Violet 421 Ly-6G               | BioLegend           | 126627    | 1:200                 |                                    |
| Alexa Fluor 488 Ly-6C                    | BioLegend           | 128022    | 1:100                 |                                    |
| Rat anti-mouse MOMA-2                    | Bio-Rad             | MCA519G   | 1:200                 |                                    |
| Rat anti-mouse CD68                      | Bio-Rasd            | MCA1957Ga | 1:300                 |                                    |

|                   |            |         |        |  |
|-------------------|------------|---------|--------|--|
| Akt3              | Abcam      | ab5922A | 1:1000 |  |
| Rat CCR2 antibody | R&D System | MAB8368 | 1:200  |  |

**Gene expression assays**

| <b>Name</b>        | <b>Catalog N</b> | <b>Vendor or Source</b> |
|--------------------|------------------|-------------------------|
| Mouse <i>Tnf</i>   | Mm00443258_m1    | Applied Biosystems      |
| Mouse <i>IL6</i>   | Mm00446191_m1    | Applied Biosystems      |
| Mouse <i>Il12a</i> | Mm00434169_m1    | Applied Biosystems      |
| Mouse <i>Il10</i>  | Mm99999062_m1    | Applied Biosystems      |
| Mouse <i>Rela</i>  | Mm00501346_m1    | Applied Biosystems      |
| Mouse <i>Akt1</i>  | Mm00437443_m1    | Applied Biosystems      |
| Mouse <i>Akt2</i>  | Mm00545827_m1    | Applied Biosystems      |
| Mouse <i>Akt3</i>  | Mm00442194_m1    | Applied Biosystems      |
| 18S                | Hs99999901_s1    | Applied Biosystems      |
